# Supplementary material
Source: Royal Society of Chemistry journal article supplement (doi:10.1039/d6em00027d)
Supplement: d6em00027d1.pdf [file d6em00027d1.pdf]

## Appendix:

### 1. Adsorption kinetics results

(1) The mathematical expression of the pseudo-first-order kinetic model is as follows:

|  |                                    |     |
|--|------------------------------------|-----|
|  | $\frac{dq_t}{dt} = k_1(q_e - q_t)$ | (1) |
|--|------------------------------------|-----|

The conditions for integration are  $t = 0$  to  $t$  and  $q_t = 0$  to  $q_t$ .

|  |                             |     |
|--|-----------------------------|-----|
|  | $q_t = q_e(1 - e^{-k_1 t})$ | (2) |
|--|-----------------------------|-----|

Taking the logarithm of both sides  $\ln$  simultaneously yields the following formula.

|  |                                    |     |
|--|------------------------------------|-----|
|  | $\ln(q_e - q_t) = \ln q_e - K_1 t$ | (3) |
|--|------------------------------------|-----|

In the formula,  $K_1$  ( $\text{min}^{-1}$ ) is the rate constant of the pseudo-first-order kinetic model, and  $q_t$  ( $\text{mg}\cdot\text{g}^{-1}$ ) and  $q_e$  ( $\text{mg}\cdot\text{g}^{-1}$ ) are the adsorption amounts at time  $t$  and equilibrium, respectively.

(2) The mathematical expression of the differential form of the pseudo-second-order kinetic model is as follows:

|  |                                      |     |
|--|--------------------------------------|-----|
|  | $\frac{dq_t}{dt} = k_2(q_e - q_t)^2$ | (4) |
|--|--------------------------------------|-----|

The conditions for integration are  $t = 0$  to  $t$  and  $q_t = 0$  to  $q_t$ .

|  |                                           |     |
|--|-------------------------------------------|-----|
|  | $q_t = \frac{q_e^2 k_2 t}{1 + q_e k_2 t}$ | (5) |
|--|-------------------------------------------|-----|

Transforming it into a linear relationship yields the following formula:

|  |                                                       |     |
|--|-------------------------------------------------------|-----|
|  | $\frac{t}{q_t} = \frac{1}{k_2 q_e^2} + \frac{t}{q_e}$ | (6) |
|--|-------------------------------------------------------|-----|

In the formula,  $K_2$  ( $\text{g}\cdot\text{mg}^{-1}\cdot\text{min}^{-1}$ ) is the rate constant of the pseudo-second-order kinetic model, and  $q_t$  ( $\text{mg}\cdot\text{g}^{-1}$ ) and  $q_e$  ( $\text{mg}\cdot\text{g}^{-1}$ ) are the adsorption amounts at time  $t$  and equilibrium, respectively.

(2) (3) The mathematical derivation of the Elovich equation is as follows:

|  |                                             |     |
|--|---------------------------------------------|-----|
|  | $\frac{dq_t}{dt} = \alpha \exp(-\beta q_t)$ | (7) |
|--|---------------------------------------------|-----|

Setting  $t$  and  $q_t$  to both 0, we get

|  |                                                                 |     |
|--|-----------------------------------------------------------------|-----|
|  | $q_t = \frac{1}{\beta} \ln(t + t_0) - \frac{1}{\beta} \ln(t_0)$ | (8) |
|--|-----------------------------------------------------------------|-----|

Let  $t_0 = 1/\alpha\beta$ , and  $t \gg t_0$ , then we get

|  |                                                                   |     |
|--|-------------------------------------------------------------------|-----|
|  | $q_t = \frac{1}{\beta} \ln(\alpha\beta) - \frac{1}{\beta} \ln(t)$ | (9) |
|--|-------------------------------------------------------------------|-----|

Let  $A = -1/\beta$ ,  $B = 1/\beta \ln(\alpha\beta)$ , the above equation can be simplified to A

|  |                     |      |
|--|---------------------|------|
|  | $q_t = A \ln t + B$ | (10) |
|--|---------------------|------|

Parameters A and B are the fitting parameters of the Elovich model,  $q_t$  is the adsorption amount ( $\text{mg} \cdot \text{g}^{-1}$ ) at adsorption time  $t$ , and  $t$  is the reaction time (h).

(4) The intraparticle diffusion model describes the adsorption process by plotting the relationship between  $q_t$  and  $t^{0.5}$ . Its mathematical expression is:

|  |                         |      |
|--|-------------------------|------|
|  | $q_t = K_3 t^{0.5} + C$ | (11) |
|--|-------------------------|------|

In the formula,  $K_3$  ( $\text{g} \cdot \text{mg}^{-1} \cdot \text{min}^{-1}$ ) is the diffusion rate constant within the particle,  $C$  ( $\text{mg} \cdot \text{g}^{-1}$ ) is a constant related to the adsorption boundary thickness,  $q_t$  is the adsorption ( $\text{mg} \cdot \text{g}^{-1}$ ) at adsorption time  $t$ , and  $t$  is the reaction time (h).

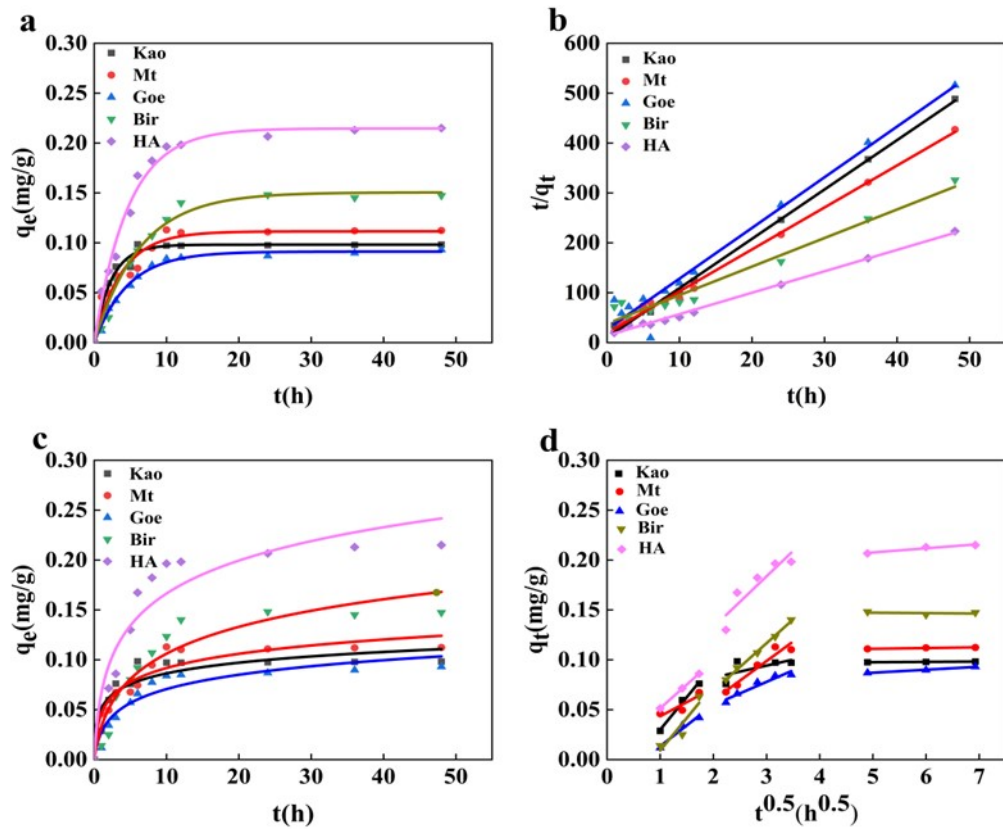

Figure S1 Fitting diagram of benzene adsorption kinetic model under different treatment conditions: pseudo-first-order kinetic model (a), pseudo-second-order kinetic model (b), Elovich model (c), intragranular diffusion model (d)

**Table S1 Fitting parameters of benzene adsorption kinetic model under different treatment conditions : pseudo-first-order kinetic model, pseudo-second-order kinetic model, Elovich model**

| Adsorbate | Pseudo-first-order kinetic model        |                                        |                | Pseudo-second-order kinetic model       |                                                            |                | Elovich model |       |                |
|-----------|-----------------------------------------|----------------------------------------|----------------|-----------------------------------------|------------------------------------------------------------|----------------|---------------|-------|----------------|
|           | Q <sub>e</sub><br>(mg·g <sup>-1</sup> ) | K <sub>1</sub><br>(min <sup>-1</sup> ) | R <sup>2</sup> | Q <sub>e</sub><br>(mg·g <sup>-1</sup> ) | K <sub>2</sub><br>(g·mg <sup>-1</sup> ·min <sup>-1</sup> ) | R <sup>2</sup> | A             | B     | R <sup>2</sup> |
| Kao       | 0.092                                   | 0.43                                   | 0.9879         | 0.093                                   | 0.016                                                      | 0.9777         | 2.46          | 8.05  | 0.8756         |
| Mt        | 0.11                                    | 0.26                                   | 0.9315         | 0.12                                    | 0.021                                                      | 0.9953         | 5.83          | 12.32 | 0.9189         |
| Goe       | 0.098                                   | 0.21                                   | 0.9520         | 0.10                                    | 0.017                                                      | 0.9998         | 17.66         | 17.27 | 0.9173         |
| Bir       | 0.16                                    | 0.15                                   | 0.9830         | 0.17                                    | 0.040                                                      | 0.9996         | 19.86         | 4.05  | 0.9148         |
| HA        | 0.21                                    | 0.21                                   | 0.9872         | 0.23                                    | 0.063                                                      | 0.9952         | 6.99          | 7.52  | 0.9146         |

**Table S2 Fitting parameters of the intragranular diffusion model of benzene under different treatment conditions**

| Adsorbate | K <sub>p1</sub> | C <sub>1</sub> | R <sub>1</sub> <sup>2</sup> | K <sub>p2</sub> | C <sub>2</sub> | R <sub>2</sub> <sup>2</sup> | K <sub>p3</sub> | C <sub>3</sub> | R <sub>3</sub> <sup>2</sup> |
|-----------|-----------------|----------------|-----------------------------|-----------------|----------------|-----------------------------|-----------------|----------------|-----------------------------|
| Kao       | 0.065           | -0.035         | 0.9908                      | 0.012           | 0.058          | 0.9824                      | 0.0003          | 0.096          | 0.9987                      |
| Mt        | 0.039           | -0.019         | 0.9368                      | 0.028           | 0.015          | 0.9332                      | 0.0007          | 0.11           | 0.9677                      |
| Goe       | 0.042           | -0.029         | 0.9606                      | 0.023           | 0.0086         | 0.9291                      | 0.0030          | 0.072          | 0.9903                      |
| Bir       | 0.065           | -0.056         | 0.9598                      | 0.048           | 0.026          | 0.9967                      | 0.0004          | 0.15           | 0.9379                      |
| HA        | 0.048           | 0.0040         | 0.9599                      | 0.031           | 0.031          | 0.9371                      | 0.0002          | 0.19           | 0.9423                      |

Adsorption kinetics results showed that the adsorption of benzene by different minerals and humic acid proceeded rapidly within 0–4 h, gradually slowed down from 4–12 h, and reached equilibrium at approximately 12 h. The equilibrium adsorption capacity followed the order: humic acid (0.22 mg·g<sup>-1</sup>) > manganese hydrate (0.15 mg·g<sup>-1</sup>) > montmorillonite (0.11 mg·g<sup>-1</sup>) > goethite (0.098 mg·g<sup>-1</sup>) > kaolinite (0.093 mg·g<sup>-1</sup>), indicating that humic acid had the strongest adsorption capacity. Kinetic model fitting showed that, except for kaolinite, the pseudo-second-order model best fit the adsorption systems (R<sup>2</sup>≈0.995–0.999), and the fitted Q<sub>e</sub> was consistent with the measured value, indicating that the adsorption process was mainly chemisorption.

Humic acid had the highest rate constant  $K_2$  ( $0.063 \text{ g} \cdot \text{mg}^{-1} \text{ min}^{-1}$ ), indicating that it had a stronger affinity for benzene. Kaolinite better fit the pseudo-first-order model, indicating that its adsorption was mainly a diffusion process. The intraparticle diffusion model ( $R^2 > 0.93$ ) shows that the adsorption process can be divided into three stages: rapid surface adsorption, pore/interlayer diffusion, and equilibrium. The fitted line does not pass through the origin, indicating that the adsorption process is jointly controlled by surface adsorption and intraparticle diffusion. By fitting the kinetic curves, we found that the adsorption of benzene by minerals and humic acid reached equilibrium after 12 h, which can provide a time reference for subsequent adsorption experiments.

## 2. Relevant Formulas and Schematic Diagrams of Machine Learning Models

When configuring model parameters, the random forest (RF) model was set with  $n\_estimators$  (number of trees) = 300,  $max\_depth$  (maximum depth of a tree) = 10,  $min\_samples\_split$  (minimum samples required for node splitting) = 2, and  $random\_state$  (random seed) = 42. The Artificial Neural Network (ANN) model was set with  $hidden\_size$  (dimension of the hidden layer) = 14, ReLU (rectified linear unit) activation,  $learning\_rate$  = 0.01,  $epochs$  (number of full training iterations) = 500, and  $random\_state$  (random seed) = 42. The Support Vector Machine (SVM) model was set with  $max\_iter$  (maximum training iterations) = 10000,  $C$  (regularization parameter) = 300,  $kernel$  = poly (polynomial kernel),  $epsilon$  (tolerance interval) = 0.1, and  $random\_state$  (random seed) = 15000.

The RF model calculates feature importance using the Gini Impurity Decrease method, which evaluates how much each feature reduces Gini impurity when splitting decision tree nodes. The formula is as follows:

|  |                                                                                                               |      |
|--|---------------------------------------------------------------------------------------------------------------|------|
|  | $I(t) = 1 - \sum_{K=1}^K p_{kt}^2$                                                                            | (12) |
|  | $\Delta I(j,t) = I(t) - \left( \frac{N_{left}}{N_t} I(t_{left}) + \frac{N_{right}}{N_t} I(t_{right}) \right)$ | (13) |

|  |                                                                                |      |
|--|--------------------------------------------------------------------------------|------|
|  | $Importance_T(j) = \sum_{t \in T} \Delta I(j,t) \cdot \Pi(j,t)$                | (14) |
|  | $Importance(j) = \frac{1}{N_{trees}} \sum_{T=1}^{N_{trees}} Importance_T(j)$   | (15) |
|  | $Normalized\ Importance(j) = \frac{Importance(j)}{\sum_{i=1}^d Importance(j)}$ | (16) |

In these formulas,  $K$  represents the total number of categories;  $p_{kt}$  denotes the proportion of samples of the  $k$ -th category in node  $t$ ;  $I(t)$  signifies the Gini impurity before splitting the node;  $t_{left}$  and  $t_{right}$  denote the left and right child nodes after splitting;  $N_t$ ,  $N_{left}$ , and  $N_{right}$  stand for the number of samples in node  $t$ , the left child node, and the right child node;  $N_{trees}$  represents the number of trees in the forest, and  $T$  denotes a single decision tree;  $\Pi(\cdot)$  is an indicator function (1 if feature  $j$  is split at node  $t$ , otherwise 0); and  $Normalized\ Importance(j)$  denotes the normalized feature importance.

The ANN model calculates feature importance using the Garson algorithm (Fernandes et al., 2020), which evaluates the relative contribution of each input variable based on the connection weights between layers. The specific calculation formulas are as follows:

|  |                                                                                                                                                                                                                                                                                          |      |
|--|------------------------------------------------------------------------------------------------------------------------------------------------------------------------------------------------------------------------------------------------------------------------------------------|------|
|  | $I_j = \frac{\sum_{m=1}^{m=Nh} \left[ \left( \frac{ W_{jm}^{ih} }{\sum_{k=1}  W_{km}^{ih} } \right) \times  W_{mn}^{ho}  \right]}{\sum_{k=1}^{k=Ni} \left[ \sum_{m=1}^{m=Nh} \left[ \left( \frac{ W_{jm}^{ih} }{\sum_{k=1}  W_{km}^{ih} } \right) \times  W_{mn}^{ho}  \right] \right]}$ | (17) |
|--|------------------------------------------------------------------------------------------------------------------------------------------------------------------------------------------------------------------------------------------------------------------------------------------|------|

In the formula,  $I_j$  represents the relative importance of an input variable in the output variable, and  $N_i$  and  $N_h$  denote the number of neurons in the input and hidden layers;  $W$  signifies the synaptic weights connecting the layers of the neural network,

and  $I$ ,  $h$ , and  $o$  stand for the input, hidden, and output layers, respectively;  $K$ ,  $m$ , and  $n$  refer to the number of input, hidden, and output neurons, respectively.

The SVM model evaluates the importance of features through the absolute value of the weight coefficient. For linear kernel SVM, the calculation formulas are as follows:

|  |                                        |      |
|--|----------------------------------------|------|
|  | $f(x) = W^T x + b$                     | (18) |
|  | $Importance_i = \frac{ w_i }{\ W\ _1}$ | (19) |

In the formulas,  $W$  represents the weight vector;  $T$  denotes the transpose operation (which converts the weight vector from a column vector to a row vector);  $x$  stands for the input feature vector;  $b$  is the bias term;  $|w_i|$  signifies the absolute value of the  $i$ -th weight coefficient, and  $\|W\|_1$  indicates the normalized weight vector.

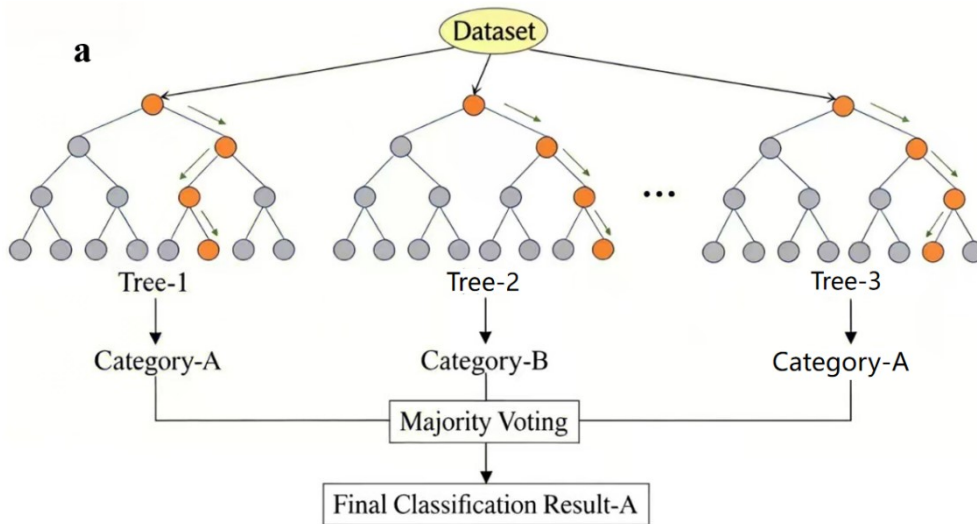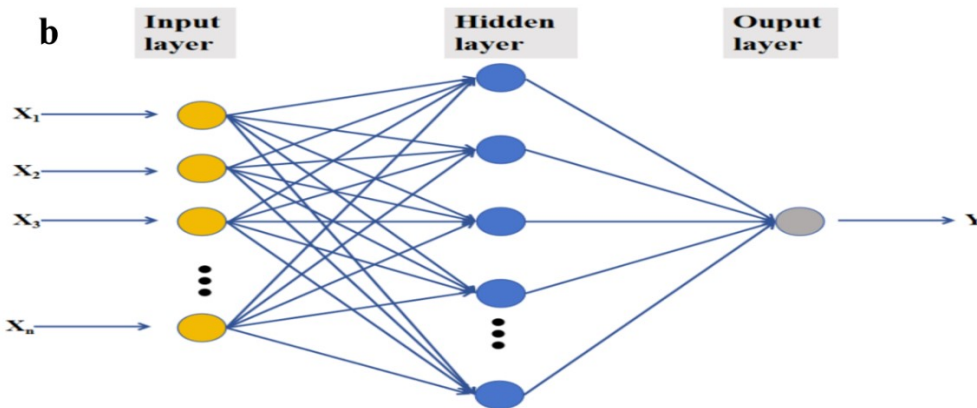

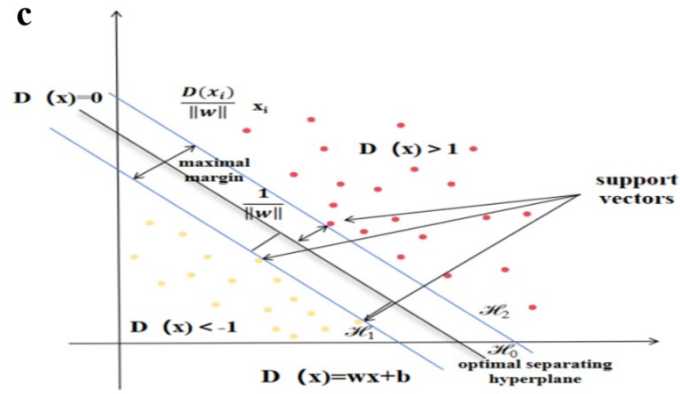

Figure S2 Schematic diagram of the Random Forest (a), Artificial Neural Network (b), and Support Vector Machine (c) models

### 3. Relevant Charts and Graphs in the Materials and Methods Section

#### 3.1 Characterization of Experimental Materials

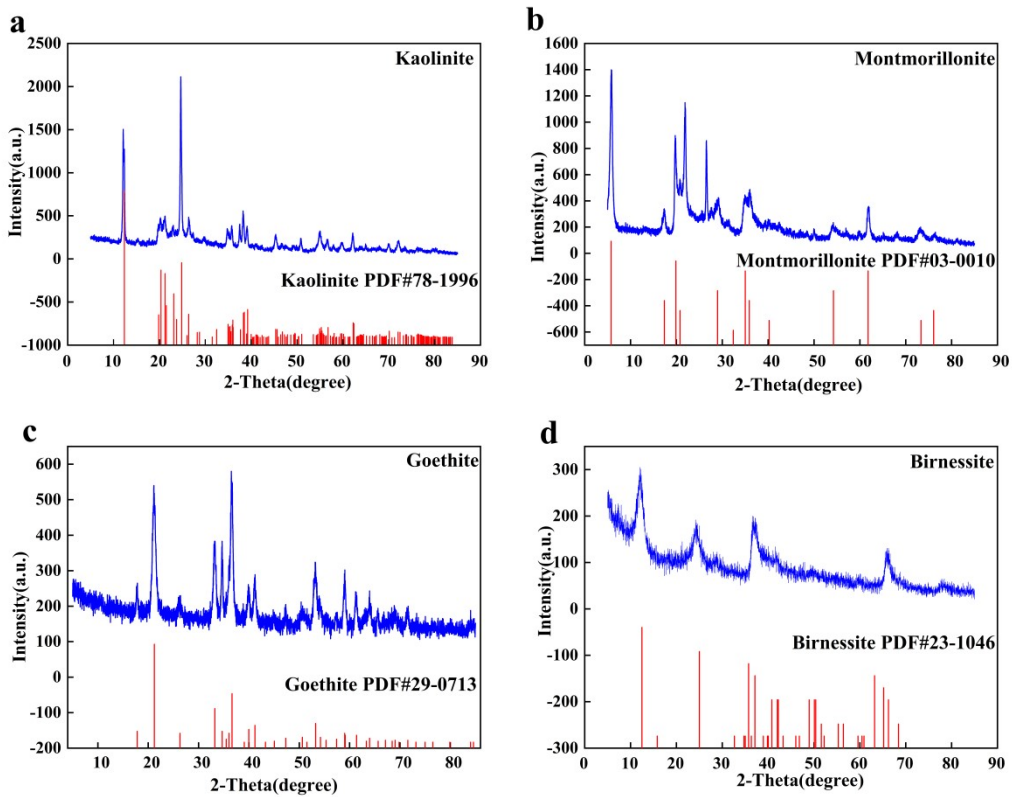

Figure S3 Comparison spectra of Kao (a), Mt (b), Goe (c), Bir (d) and corresponding standard card XRD

### 3.2 Machine Learning Modeling

The formulas for calculating relevant indicators are as follows:

|  |                                                                                                                                                                       |      |
|--|-----------------------------------------------------------------------------------------------------------------------------------------------------------------------|------|
|  | $R^2 = \frac{\left[ \sum_{i=1}^n (Y_{e,i} - \bar{Y}_{e,i})(Y_{p,i} - \bar{Y}_{p,i}) \right]^2}{\sum_{i=1}^n (Y_{e,i} - \bar{Y}_{e,i})^2 (Y_{p,i} - \bar{Y}_{p,i})^2}$ | (20) |
|  | $MSE = \frac{1}{n} \sum_{i=1}^n (Y_{p,i} - Y_{e,i})^2$                                                                                                                | (21) |
|  | $RMSE = \left[ \frac{1}{n} \sum_{i=1}^n (Y_{p,i} - Y_{e,i})^2 \right]^{\frac{1}{2}}$                                                                                  | (22) |
|  | $MAE = \frac{1}{n} \sum_{i=1}^n  Y_{e,i} - Y_{p,i} $                                                                                                                  | (23) |
|  | $MAPE = \frac{100\%}{n} \left( \sum_{i=1}^n \frac{ Y_{p,i} - Y_{e,i} }{ Y_{e,i} } \right)$                                                                            | (24) |

In these formulas,  $Y_{e,i}$  represents the experimental value,  $\bar{Y}_{e,i}$  denotes the average experimental value,  $Y_{p,i}$  signifies the predicted value,  $\bar{Y}_{p,i}$  indicates the average predicted value, and  $n$  stands for the sample size.

## 4. Relevant Charts and Graphs in the Results and Analysis section

### 4.1 The Interactive Effects of Environmental Factors on Benzene Adsorption

#### 4.1.1 Response Surface Evaluation

**Table S3 Box-Behnken test design and measurement results (mg g<sup>-1</sup>)**

| <b>Groups</b> | <b>T(°C)</b> | <b>pH</b> | <b>Pb<sup>2+</sup>(mol L<sup>-1</sup>)</b> | <b>Kao</b> | <b>Mt</b> | <b>Goe</b> | <b>Bir</b> | <b>HA</b> |
|---------------|--------------|-----------|--------------------------------------------|------------|-----------|------------|------------|-----------|
| 1             | 15           | 7.0       | 0                                          | 10.2       | 12.9      | 11.0       | 18.0       | 46.0      |
| 2             | 15           | 9.0       | 0.005                                      | 9.6        | 11.3      | 8.7        | 13.2       | 30.6      |
| 3             | 15           | 7.0       | 0.01                                       | 6.8        | 9.7       | 8.2        | 13.2       | 31.0      |
| 4             | 15           | 5.0       | 0.005                                      | 7.1        | 9.1       | 10.0       | 15.1       | 47.5      |
| 5             | 15           | 9.0       | 0.01                                       | 6.8        | 7.9       | 5.1        | 8.6        | 31.0      |
| 6             | 25           | 7.0       | 0.005                                      | 5.9        | 8.1       | 6.4        | 9.6        | 31.7      |
| 7             | 25           | 5.0       | 0                                          | 7.1        | 9.6       | 10.1       | 14.4       | 45.2      |
| 8             | 25           | 9.0       | 0                                          | 9.7        | 11.8      | 7.8        | 12.4       | 33.0      |
| 9             | 25           | 7.0       | 0.005                                      | 5.9        | 7.4       | 6.2        | 8.9        | 30.5      |
| 10            | 25           | 7.0       | 0.005                                      | 6.8        | 7.9       | 7.1        | 9.7        | 30.6      |
| 11            | 25           | 7.0       | 0.005                                      | 6.3        | 7.9       | 6.9        | 10.8       | 27.2      |
| 12            | 25           | 5.0       | 0.01                                       | 4.7        | 5.9       | 7.3        | 11.3       | 19.3      |
| 13            | 25           | 7.0       | 0.005                                      | 6.7        | 7.4       | 6.7        | 10.0       | 27.4      |
| 14            | 35           | 9.0       | 0.005                                      | 4.6        | 5.9       | 3.3        | 2.8        | 8.0       |
| 15            | 35           | 5.0       | 0.005                                      | 3.3        | 3.6       | 4.7        | 7.7        | 20.3      |
| 16            | 35           | 7.0       | 0.01                                       | 3.1        | 3.5       | 2.8        | 4.7        | 9.8       |
| 17            | 35           | 7.0       | 0                                          | 5.6        | 7.3       | 5.3        | 8.9        | 24.6      |

Notes: 1. Kao = Kaolinite; Mt = montmorillonite; Goe = Goethite; Bir = Birnessite; HA = humic acid. 2. T and Pb<sup>2+</sup> represents temperature (°C) and coexisting Pb<sup>2+</sup> concentration (mol/L)

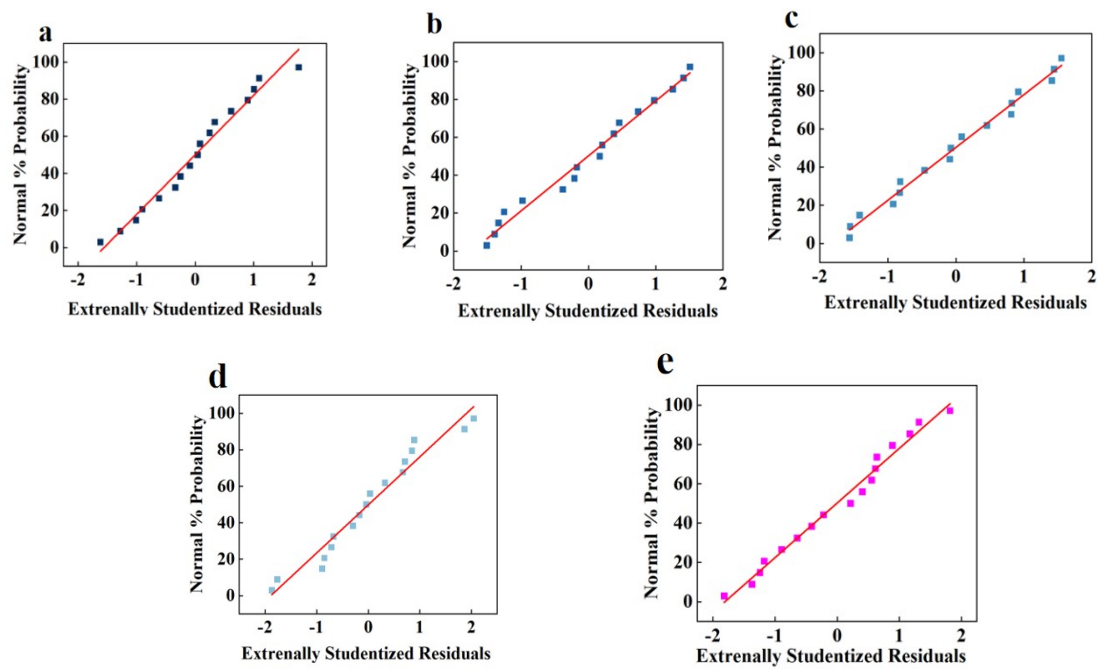

**Figure S4 Normal probability distribution plots of 3D response surface model fittings under different treatments: Kao (a), Mt (b), Goe (c), Bir (d), HA (e)**

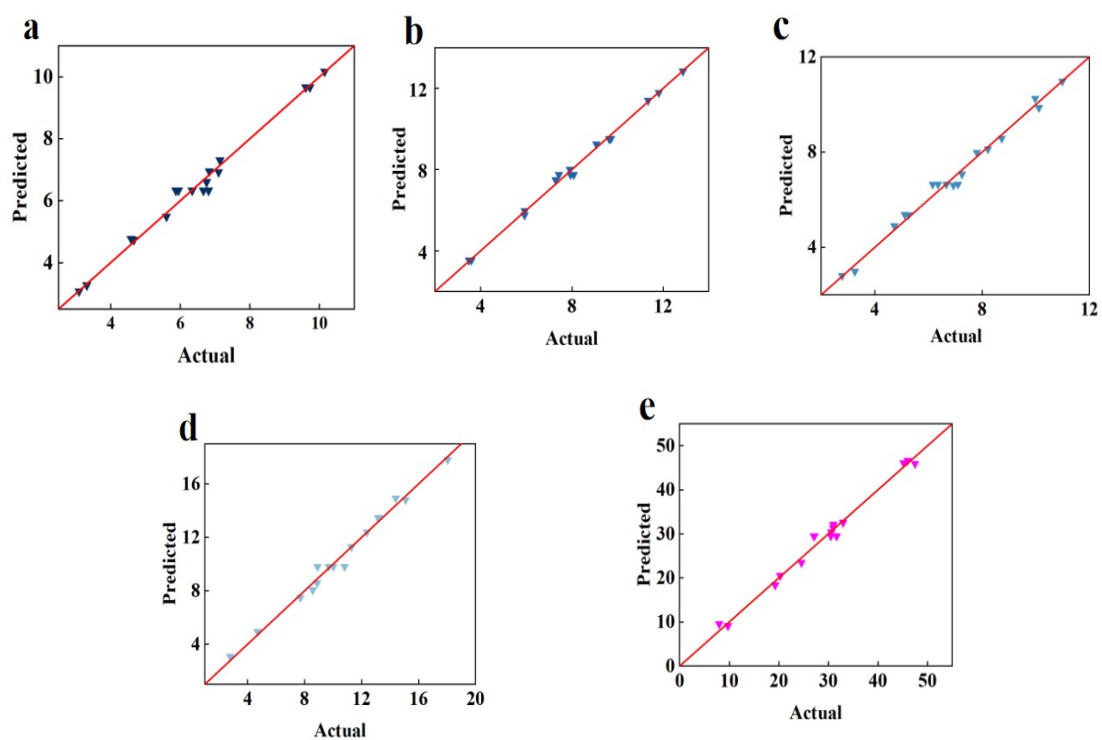

**Figure S5** Scatter distribution plots of predicted Vs. actual values fitted to the 3D response surface model under different treatments: Kao (a), Mt (b), Goe (c), Bir (d), HA (e)

**Table S4 Response surface fitting quadratic model ANOVA table for benzene adsorption by Kao, Mt, Goe, Bir and HA**

| Factor item              | Model      | X <sub>1</sub> | X <sub>2</sub> | X <sub>3</sub> | X <sub>1</sub> X <sub>2</sub> | X <sub>1</sub> X <sub>3</sub> | X <sub>2</sub> X <sub>3</sub> | X <sub>1</sub> <sup>2</sup> | X <sub>2</sub> <sup>2</sup> | X <sub>3</sub> <sup>2</sup> | Residual | Deviance | Pure error | Sum   | R <sup>2</sup> | R <sup>2</sup> adj | CV(%)  | Precision |       |
|--------------------------|------------|----------------|----------------|----------------|-------------------------------|-------------------------------|-------------------------------|-----------------------------|-----------------------------|-----------------------------|----------|----------|------------|-------|----------------|--------------------|--------|-----------|-------|
| <b>Degree of freedom</b> | 9          | 1              | 1              | 1              | 1                             | 1                             | 1                             | 1                           | 1                           | 1                           | 7        | 3        | 4          | 16    |                |                    |        |           |       |
| <b>Sum of squares</b>    | <b>Kao</b> | 63.92          | 36.56          | 8.92           | 15.86                         | 0.38                          | 0.1                           | 0.06                        | 0.72                        | 0.24                        | 1.08     | 0.85     | 0.15       | 0.70  | 64.77          | 0.9869             | 0.9700 | 5.38      | 26.52 |
|                          | <b>Mt</b>  | 104.96         | 64.36          | 9.55           | 26.48                         | 0.0008                        | 0.10                          | 0.0095                      | 0.58                        | 0.051                       | 3.93     | 0.55     | 0.18       | 0.37  | 105.51         | 0.9948             | 0.9781 | 3.47      | 43.25 |
|                          | <b>Goe</b> | 83.36          | 59.53          | 6.42           | 14.59                         | 0.013                         | 0.021                         | 0.0083                      | 0.56                        | 0.66                        | 1.20     | 1.02     | 0.41       | 0.61  | 84.38          | 0.9879             | 0.9723 | 5.53      | 27.91 |
|                          | <b>Bir</b> | 220.56         | 157.30         | 16.57          | 31.94                         | 2.36                          | 0.13                          | 0.12                        | 0.34                        | 0.13                        | 11.70    | 3.01     | 1.11       | 1.90  | 3.01           | 0.9865             | 0.9692 | 6.22      | 29.31 |
|                          | <b>HA</b>  | 1911.2         | 1069.26        | 351.94         | 416.59                        | 5.27                          | 0.0044                        | 0.067                       | 53.66                       | 2.03                        | 15.82    | 27.18    | 10.30      | 16.88 | 1938.45        | 0.9860             | 0.9679 | 6.79      | 24.85 |
| <b>Mean square</b>       | <b>Kao</b> | 7.10           | 36.56          | 8.92           | 15.86                         | 0.38                          | 0.16                          | 0.06                        | 0.72                        | 0.24                        | 1.08     | 0.12     | 0.05       | 0.18  |                |                    |        |           |       |
|                          | <b>Mt</b>  | 11.66          | 64.36          | 9.55           | 26.48                         | 0.01                          | 0.10                          | 0.01                        | 0.59                        | 0.050                       | 3.93     | 0.08     | 0.06       | 0.09  |                |                    |        |           |       |
|                          | <b>Goe</b> | 9.26           | 59.53          | 6.42           | 14.59                         | 0.01                          | 0.02                          | 0.01                        | 0.56                        | 0.66                        | 1.20     | 0.15     | 0.14       | 0.15  |                |                    |        |           |       |
|                          | <b>Bir</b> | 24.51          | 157.30         | 16.57          | 31.94                         | 2.36                          | 0.13                          | 0.12                        | 0.34                        | 0.13                        | 11.70    | 0.43     | 0.37       | 0.47  |                |                    |        |           |       |
|                          | <b>HA</b>  | 212.36         | 1069.26        | 351.94         | 416.59                        | 5.27                          | 0.01                          | 0.07                        | 53.66                       | 2.03                        | 15.82    | 3.88     | 3.43       |       |                |                    |        |           |       |
| <b>F</b>                 | <b>Kao</b> | 58.40          | 300.66         | 73.39          | 130.44                        | 3.12                          | 1.32                          | 0.50                        | 5.96                        | 1.98                        | 8.88     |          | 0.29       |       |                |                    |        |           |       |
|                          | <b>Mt</b>  | 148.00         | 816.81         | 121.16         | 336.09                        | 0.01                          | 1.29                          | 0.12                        | 7.39                        | 0.64                        | 49.90    |          | 0.65       |       |                |                    |        |           |       |
|                          | <b>Goe</b> | 63.50          | 410.86         | 44.04          | 100.06                        | 0.09                          | 0.10                          | 0.06                        | 3.83                        | 4.50                        | 8.22     |          | 0.88       |       |                |                    |        |           |       |
|                          | <b>Bir</b> | 54.69          | 275.35         | 90.63          | 107.28                        | 1.36                          | 0.01                          | 0.02                        | 13.82                       | 0.52                        | 4.07     |          | 0.81       |       |                |                    |        |           |       |
|                          | <b>HA</b>  | 54.69          | 275.35         | 90.63          | 107.28                        | 1.36                          | 0.01                          | 0.02                        | 13.82                       | 0.52                        | 4.07     |          | 0.81       |       |                |                    |        |           |       |
| <b>P</b>                 | <b>Kao</b> | 0.0001**       | 0.0001**       | 0.0001**       | 0.0001**                      | 0.1209                        | 0.2878                        | 0.5009                      | 0.0447*                     | 0.2021*                     | 0.0205*  |          | 0.8339     |       |                |                    |        |           |       |
|                          | <b>Mt</b>  | 0.0001**       | 0.0001**       | 0.0001**       | 0.0001**                      | 0.9213                        | 0.2933                        | 0.7392                      | 0.0298*                     | 0.4500*                     | 0.0002** |          | 0.6229     |       |                |                    |        |           |       |
|                          | <b>Goe</b> | 0.0001**       | 0.0001**       | 0.0003**       | 0.0001**                      | 0.7754                        | 0.7151                        | 0.8188                      | 0.0910                      | 0.0715                      | 0.0241*  |          | 0.5220     |       |                |                    |        |           |       |
|                          | <b>Bir</b> | 0.0001**       | 0.0001**       | 0.0004**       | 0.0001**                      | 0.0516                        | 0.6057                        | 0.6137                      | 0.4016                      | 0.5940                      | 0.0012*  |          | 0.5622     |       |                |                    |        |           |       |
|                          | <b>HA</b>  | 0.0001**       | 0.0001**       | 0.0001**       | 0.0001**                      | 0.2821                        | 0.9741                        | 0.8996                      | 0.0075                      | 0.4936                      | 0.0834   |          | 0.5492     |       |                |                    |        |           |       |

Notes: X<sub>1</sub>, X<sub>2</sub>, and X<sub>3</sub> represent temperature (°C), pH, and coexisting Pb<sup>2+</sup> concentration (mol/L), respectively; \* indicates significant difference (p < 0.05), and \*\* indicates extremely significant difference (p < 0.01)

### 4.1.2 Interactive Analysis of 3D Response Surfaces

1. The second-order polynomial regression equation for the interaction of environmental factors on kaolinite's adsorption of benzene:

$$Y_1 = 7.60191 + 0.081251X_1 + 0.137502X_2 - 497.90948X_3 - 0.015388X_1X_2 + 4.01167X_1X_3 - 12.37408X_2X_3 - 0.0004148X_1^2 + 0.059798X_2^2 + 20260.35211X_3^2 \quad (25)$$

2. The second-order polynomial regression equation for the interaction between montmorillonite and environmental factors on benzene adsorption is:

$$Y_2 = 12.37422 + 0.086756X_1 + 0.1695282X_2 - 636.65897X_3 - 0.000719X_1X_2 - 3.18884X_1X_3 - 4.86240X_2X_3 - 0.003719X_1^2 + 0.027360X_2^2 + 38653.31830X_3^2 \quad (26)$$

3. The second-order polynomial regression equation for the interaction of environmental factors on benzene adsorption by goethite:

$$Y_3 = 20.90894 - 0.078891X_1 - 1.78229X_2 - 551.73454X_3 - 0.002832X_1X_2 + 1.45188X_1X_3 + 4.54165X_2X_3 - 0.003645X_1^2 + 0.098737X_2^2 + 21350.85161X_3^2 \quad (27)$$

4. The second-order polynomial regression equation for the interaction of environmental factors on benzene adsorption by birnessite:

$$Y_4 = 23.11461 - 0.049645X_1 - 0.297188X_2 - 1033.78770X_3 - 0.038408X_1X_2 + 3.54373X_1X_3 - 17.31797X_2X_3 - 0.002853X_1^2 + 0.044602X_2^2 + 66676.57467X_3^2 \quad (28)$$

5. The second-order polynomial regression equation for the interaction of environmental factors on benzene adsorption by humic acid:

$$Y_5 = 87.49769 + 0.223697X_1 - 7.24328X_2 - 2325.32259X_3 + 0.057399X_1X_2 + 0.662989X_1X_3 + 12.89474X_2X_3 - 0.035698X_1^2 + 0.173393X_2^2 + 77529.10295X_3^2 \quad (29)$$

In the above equations, X<sub>1</sub>, X<sub>2</sub>, and X<sub>3</sub> represent temperature, pH, and coexisting Pb<sup>2+</sup> concentration, respectively, while Y denotes the adsorption amount of benzene

### 4.2 Construction and Validation of Predictive Model

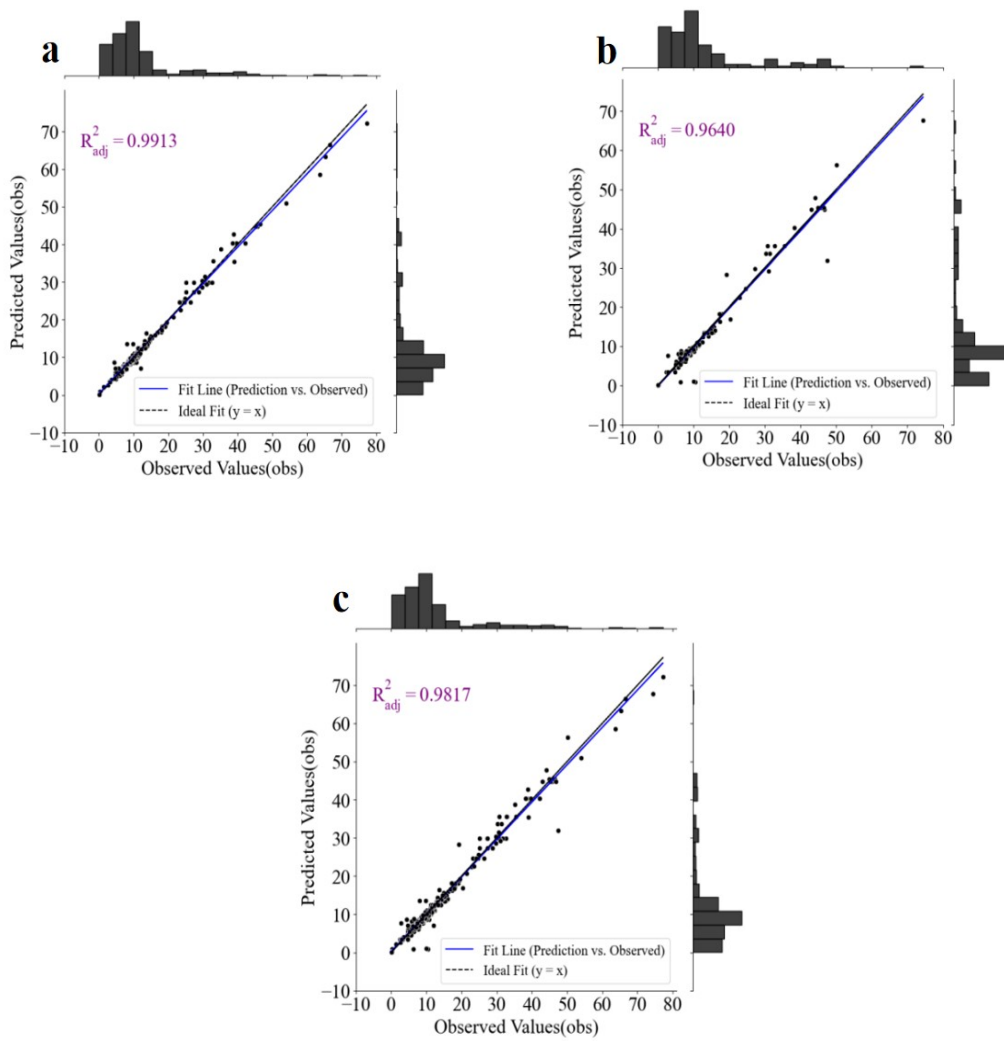

**Figure S6 Marginal histogram of the RF model dataset: training set (a), test set (b), overall dataset (c)**

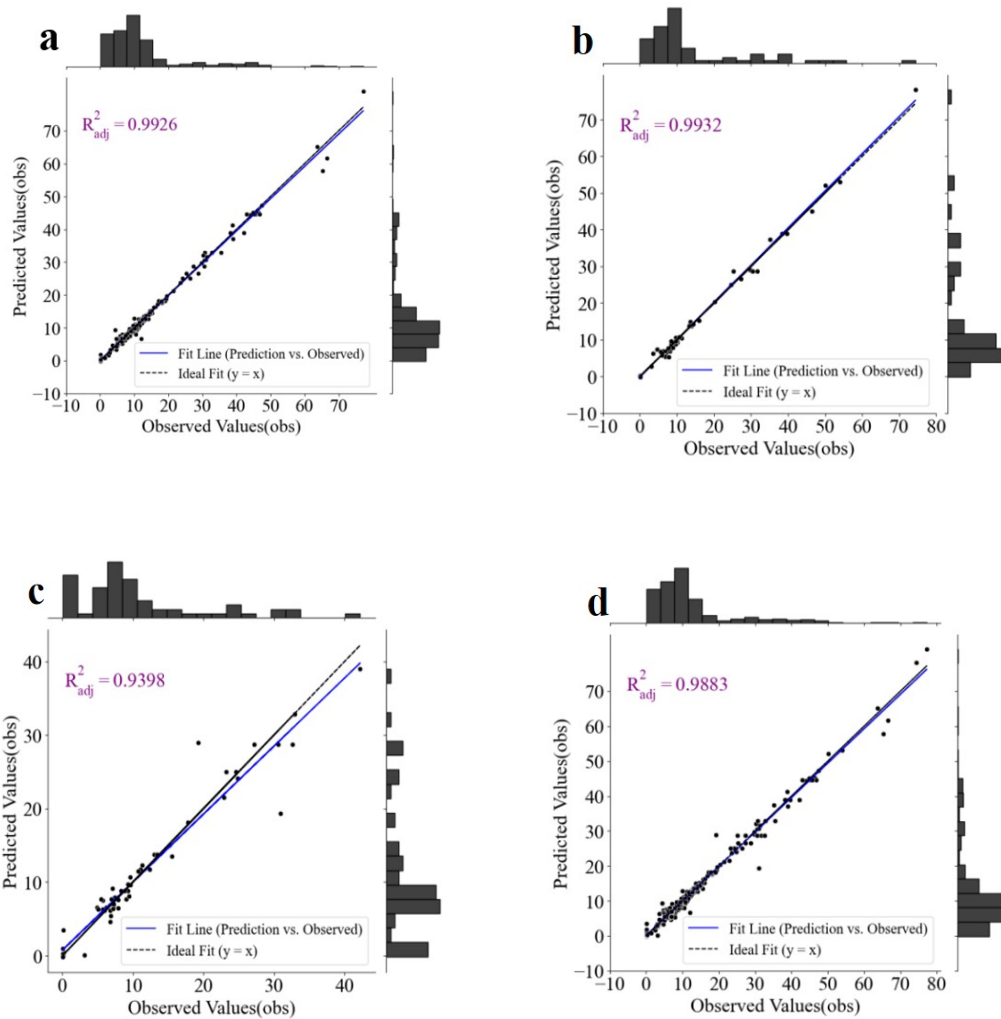

**Figure S7 Marginal histograms of different datasets of the ANN models: training set (a), validation set (b), test set (c), overall dataset (d)**

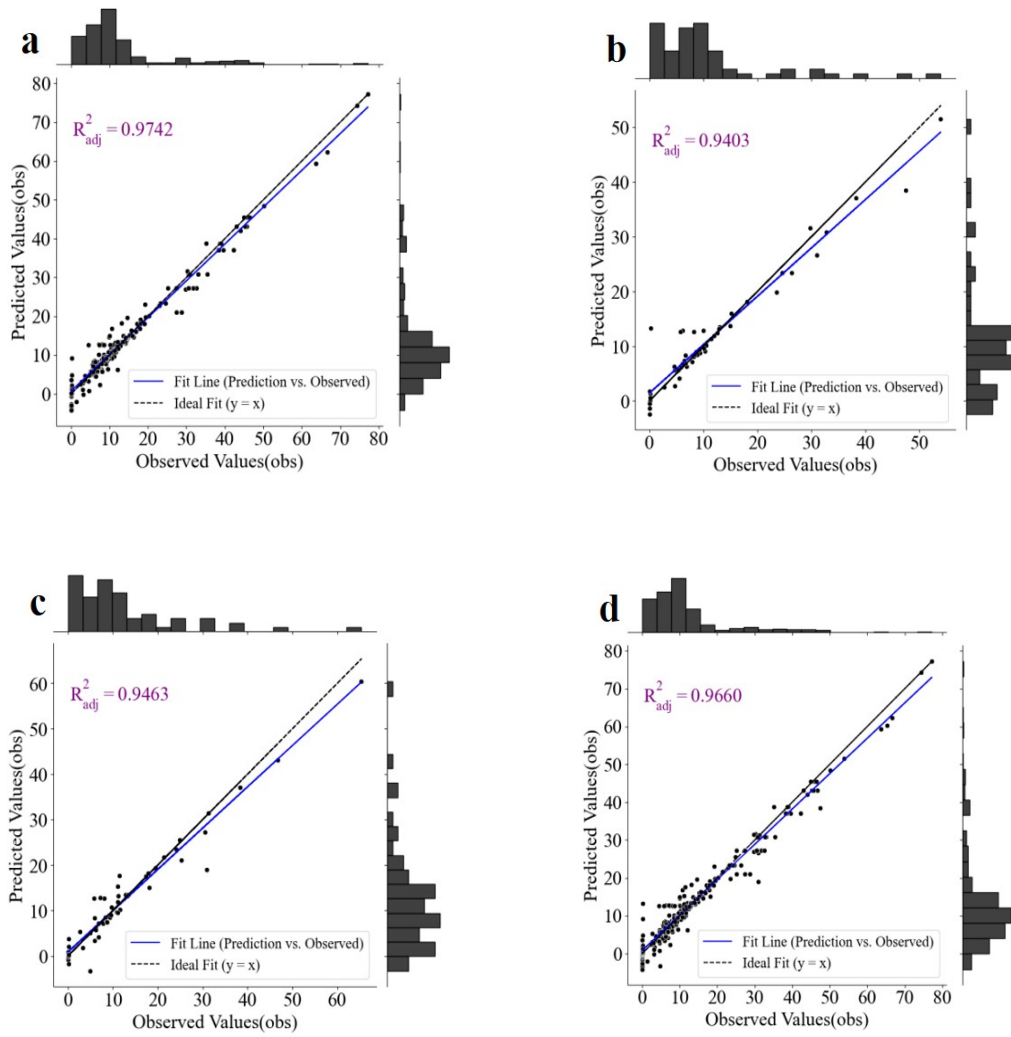

**Figure S8 Marginal histograms of different datasets of the SVM models: training set (a), validation set (b), test set (c), overall dataset (d)**
